# Supplementary material for: Loss of insulin-like growth factor II imprinting is a hallmark associated with enhanced chemo/radiotherapy resistance in cancer stem cells
Source: PubMed Central journal article supplement (PMC5239480; doi:10.18632/oncotarget.9784), 2016-06-02
Supplement: oncotarget-07-51349-s001.pdf [file oncotarget-07-51349-s001.pdf]

## Loss of insulin-like growth factor II imprinting is a hallmark associated with enhanced chemo/radiotherapy resistance in cancer stem cells

### SUPPLEMENTARY FIGURES AND TABLE

#### A. HCT116

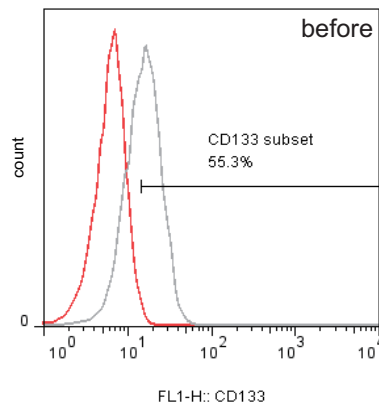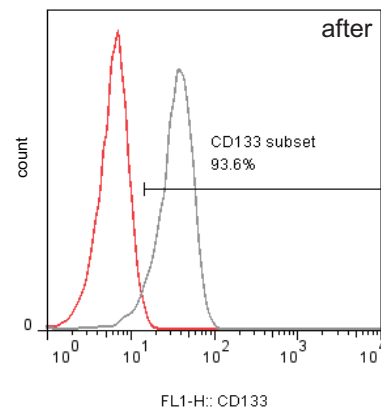

#### B. HRT18

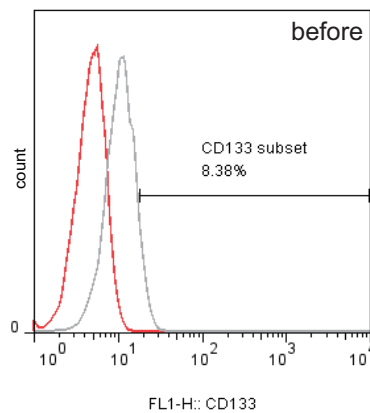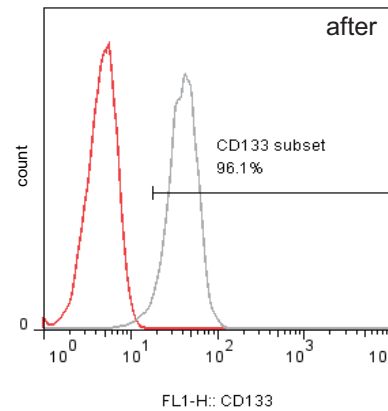

#### C. Hep3B

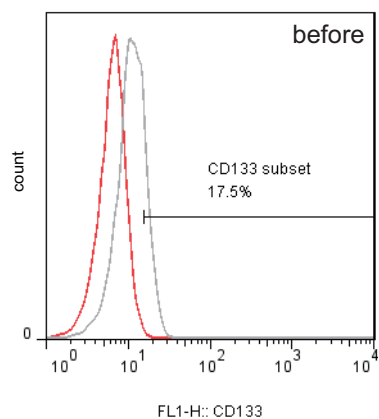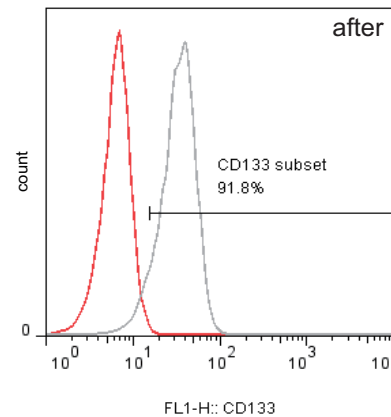

**Supplementary Figure S1: Representative FACS of CD133 positive cells plots before and after sorting.** CD133<sup>+</sup> cells were quantitated by FACS HCT116 **A.**, HRT18 **B.**, and Hep3B **C.** cells.

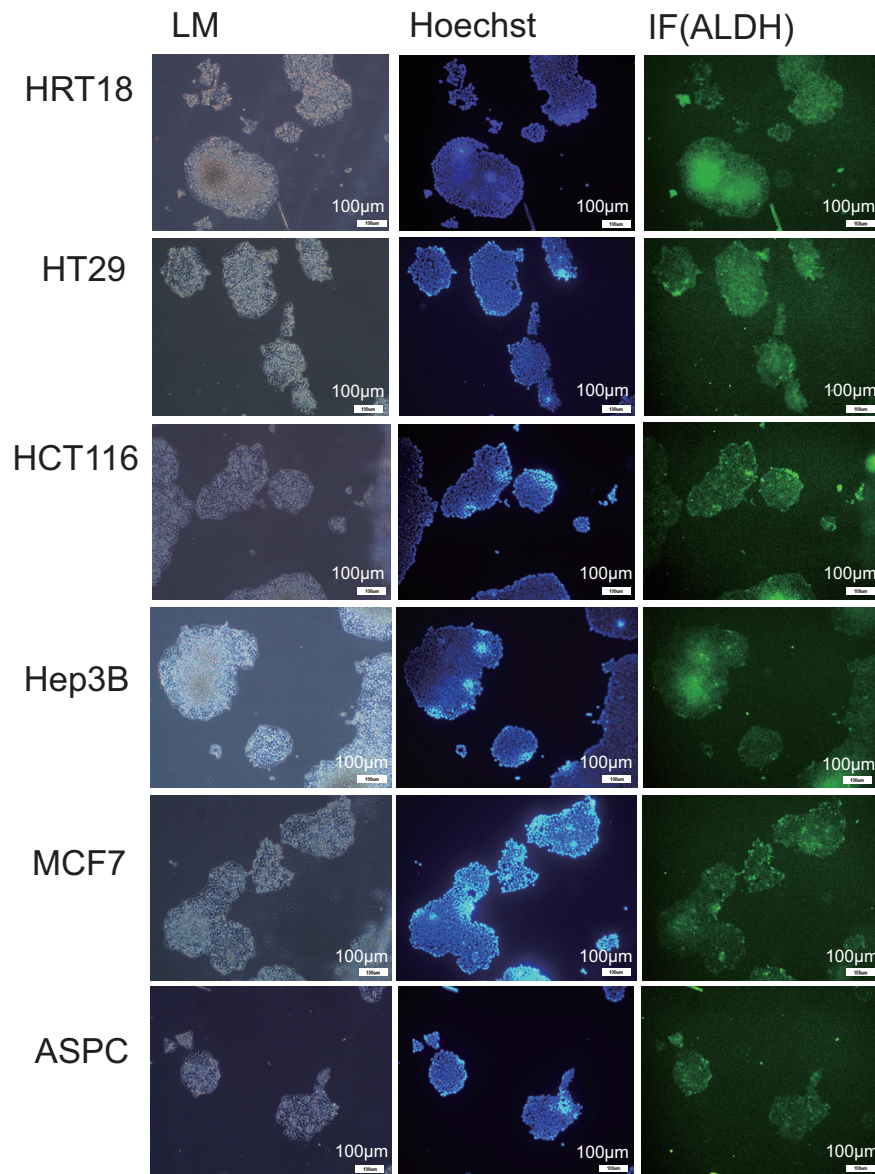

**Supplementary Figure S2: Immunofluorescence (IF) staining of CSCs with anti-ALDH antibody.** The sphere cells were treated with 4% paraformaldehyde, incubated with anti-ALDH antibody, and followed by the secondary antibody conjugated to fluorescent phycobiliproteins. Hoechst 33258 was used for nuclear counterstaining.

## A. 5-FU

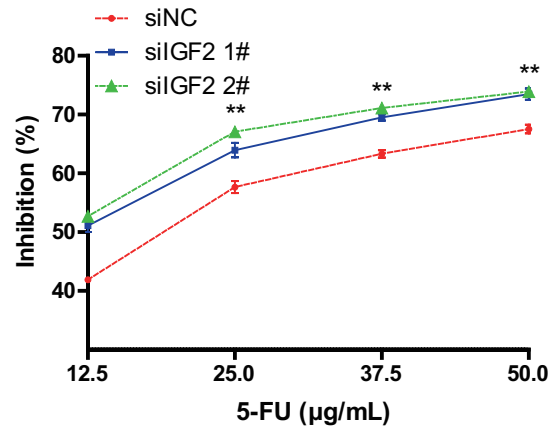

## B. Oxaliplatin

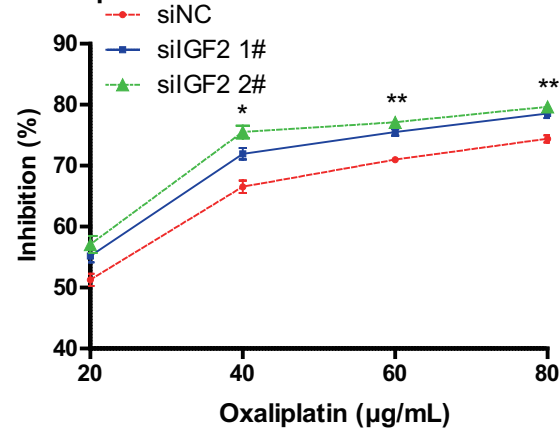

## C. Radiation

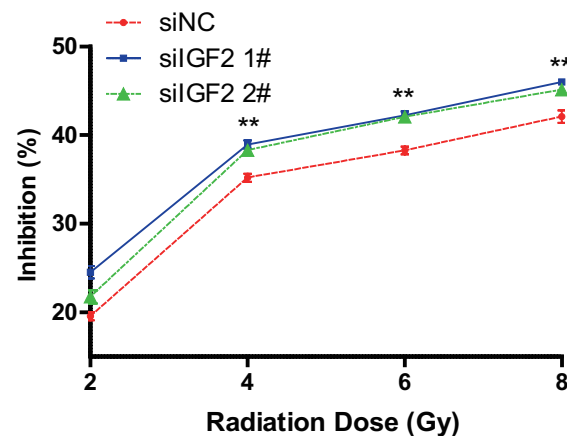

**Supplementary Figure S3: Knockdown of *IGF2* increases cell sensitivity to chemo/radiotherapies in HCT116 CSCs.**

**A.** 5-FU treatment. HCT116 CSCs were treated with 5-FU (12.5, 25, 37.5, 50 µg/ml), respectively, for 72h and were evaluated by WST-1 cell proliferation assays. The *IGF2*-knockdown CSCs are more sensitive to 5-FU than the siNC-treated CSCs. \*\* $P < 0.01$  as compared with control cells (siNC). **B.** Oxaliplatin treatment. CSCs were treated with oxaliplatin (0, 20, 40, 80, 160, 320 µg/ml). \* $P < 0.05$  and \*\* $P < 0.01$  as compared with control cells (siNC). **C.** Radiotherapy. HCT116 CSCs were irradiated with 2, 4, 6 and 8 Gy radiation, respectively. Cell proliferation was evaluated by WST-1 cell proliferation assays. *IGF2* knockdown sensitizes HCT116 CSCs to radiotherapy. \*\* $P < 0.01$  as compared with control cells (siNC).

Supplementary Table S1: PCR oligonucleotide primers

| Oligo Name                         | ID   | Oligo sequence            |
|------------------------------------|------|---------------------------|
| <i>PCR primers</i>                 |      |                           |
| Apa1                               | J923 | CTTGACTTTGAGT CAAATTGGCCT |
| Apa1                               | J924 | GAGGAGCCAGTCTGGGTTGTTGCTA |
| Alu1                               | 2949 | GTCCCCTCCTCTGCCATCACCTGA  |
| Alu1                               | 2950 | GGATTTTGCCGAAATATTAGCGT   |
| ACTB                               | J880 | CAGGTCATCACCATTGGCAATGAGC |
| ACTB                               | J881 | CGGATGTCCACGTCACTTCATGA   |
| <i>3C primers</i>                  |      |                           |
| Exon4 1st                          | SJ37 | CACTGAGTCATCTCAAAGTTAAGC  |
| Exon4 2nd                          | SJ38 | ccttcaagcacaactgcacaactcc |
| Exon5a 1st                         | SJ39 | ctct ggtgggggcgc tgggagc  |
| Exon5a 2nd                         | SJ40 | tgctgcccggagaccccagctc    |
| Exon5b 1st                         | SJ41 | tccttgatacaacagctgacctca  |
| Exon5b 2nd                         | SJ42 | ccgaaaagtacaacatctggcc    |
| CTCF 1st                           | SJ43 | cGGCCAATCAGAGCAGGGCCCTC   |
| CTCF 2nd                           | SJ44 | GCCACCTCCGCCCTGGACAGT     |
| CTCF 1st                           | SJ45 | CACCCCCTCCCTCACCTGCTCCT   |
| CTCF 2nd                           | SJ46 | CTAGCCC GGGCTTTTTTCTAACTG |
| <i>Histone methylation primers</i> |      |                           |
| M1                                 | T150 | TCTGTCTCCTACGAAGTCCCCAGAG |
| M1                                 | T151 | GAAGCCCTCCCTGTCCACGTCCTGA |
| M2                                 | T152 | TGCCTGCCCCGAGACCCCAGCTCAC |
| M2                                 | T153 | CGCAGAGCGCCAAGGCCATGCTGAA |
